# Supplementary material
Source: publisher figshare collection journal article supplement (https://rs.figshare.com/ndownloader/files/38576508)
Supplement: Supplementary file 1 [file 38576508]

**Supplementary Material**

**References of all studies used for validity check of sample 2:**

Blumberg, F. C., & Randall, J. D. (2013). What do children and adolescents say they do during video game play? Journal of Applied Developmental Psychology, 34(2), 82–88. https://doi.org/10.1016/j.appdev.2012.11.004

Suessenbach, F., Loughnan, S., Schönbrodt, F. D., & Moore, A. B. (2019). The Dominance, Prestige, and Leadership Account of Social Power Motives. European Journal of Personality, 33(1), 7–33. https://doi.org/10.1002/per.2184

Bücker, S., Nuraydin, S., Simonsmeier, B. A., Schneider, M., & Luhmann, M. (2018). Subjective well-being and academic achievement: A meta-analysis. Journal of Research in Personality, 74, 83–94. https://doi.org/10.1016/j.jrp.2018.02.007

Shneidman, L., Gweon, H., Schulz, L. E., & Woodward, A. L. (2016). Learning From Others and Spontaneous Exploration: A Cross-Cultural Investigation. Child Development, 87(3), 723–735. https://doi.org/10.1111/cdev.12502

Gurteen, P. M., Horne, P. J., & Erjavec, M. (2011). Rapid word learning in 13- and 17-month-olds in a naturalistic two-word procedure: Looking versus reaching measures. Journal of Experimental Child Psychology, 109(2), 201–217. https://doi.org/10.1016/j.jecp.2010.12.001

Oishi, S., Talhelm, T., & Lee, M. (2015). Personality and geography: Introverts prefer mountains. Journal of Research in Personality, 58, 55–68. https://doi.org/10.1016/j.jrp.2015.07.001

Johnson, J., O’Connor, D. B., Jones, C., Jackson, C., Hughes, G. J., & Ferguson, E. (2016). Reappraisal Buffers the Association Between Stress and Negative Mood Measured Over 14 Days: Implications for Understanding Psychological Resilience. European Journal of Personality, 30(6), 608–617. https://doi.org/10.1002/per.2080

Deniz Can, D., & Ginsburg-Block, M. (2016). Parenting stress and home-based literacy interactions in low-income preschool families. Journal of Applied Developmental Psychology, 46, 51–62. https://doi.org/10.1016/j.appdev.2016.07.002

Marbell-Pierre, K. N., Grolnick, W. S., Stewart, A. L., & Raftery-Helmer, J. N. (2019). Parental Autonomy Support in Two Cultures: The Moderating Effects of Adolescents’ Self-Construals. Child Development, 90(3), 825–845. https://doi.org/10.1111/cdev.12947

Jiang, Y., & Hong, J. (2014). It feels fluent, but not right: The interactive effect of expected and experienced processing fluency on evaluative judgment. Journal of Experimental Social Psychology, 54, 147–152. https://doi.org/10.1016/j.jesp.2014.05.004

Unzueta, M. M., Gutiérrez, A. S., & Ghavami, N. (2010). How believing in affirmative action quotas affects White women’s self-image. Journal of Experimental Social Psychology, 46(1), 120–126. https://doi.org/10.1016/j.jesp.2009.08.017

Kanazawa, S., & Li, N. P. (2015). Happiness in modern society: Why intelligence and ethnic composition matter. Journal of Research in Personality, 59, 111–120. https://doi.org/10.1016/j.jrp.2015.06.004

Howell, J. L., Crosier, B. S., & Shepperd, J. A. (2014). Does lacking threat-management resources increase information avoidance? A multi-sample, multi-method investigation.

Journal of Research in Personality, 50(1), 102–109. https://doi.org/10.1016/j.jrp.2014.03.003

Goodwin, G. P., Piazza, J., & Rozin, P. (2014). Moral character predominates in person perception and evaluation. Journal of Personality and Social Psychology, 106(1), 148–168. https://doi.org/10.1037/a0034726

Warren, C., & Peter McGraw, A. (2016). Differentiating what is humorous from what is not. Journal of Personality and Social Psychology, 110(3), 407–430. https://doi.org/10.1037/pspi0000041

Carlson, E. N., Vazire, S., & Oltmanns, T. F. (2011). You Probably Think This Paper’s About You: Narcissists’ Perceptions of Their Personality and Reputation. Journal of Personality and Social Psychology, 101(1), 185–201. https://doi.org/10.1037/a0023781

Romano, E., Babchishin, L., Pagani, L. S., & Kohen, D. (2010). School readiness and later achievement: Replication and extension using a nationwide Canadian Survey. Developmental Psychology, 46(5), 995–1007. https://doi.org/10.1037/a0018880

Sherman, R. A., Figueredo, A. J., & Funder, D. C. (2013). The behavioral correlates of overall and distinctive life history strategy. Journal of Personality and Social Psychology, 105(5), 873–888. https://doi.org/10.1037/a0033772

Skinner, E. A., Pitzer, J. R., & Steele, J. S. (2016). Can student engagement serve as a motivational resource for academic coping, persistence, and learning during late elementary and early middle school? Developmental Psychology, 52(12), 2099–2117. https://doi.org/10.1037/dev0000232

Aravena, S., Snellings, P., Tijms, J., & van der Molen, M. W. (2013). A lab-controlled simulation of a letter-speech sound binding deficit in dyslexia. Journal of Experimental Child Psychology, 115(4), 691–707. https://doi.org/10.1016/j.jecp.2013.03.009
